# Supplementary material for: Impact of Staphylococcus aureus Small Colony Variants on Human Lung Epithelial Cells with Subsequent Influenza Virus Infection
Source: MDPI journal article supplement (doi:10.3390/microorganisms8121998), 2020-12-15
Supplement: s1 [file Supplementary Table S1.xlsx]

## Sheet: JW34_Textdatei
#Molecules	S. aureus 3878SCV	PR8-M	Co 1	Panama	Co 2
AIM2	0.65	1.03	0.96	31.47	4.48
APOBEC3G	0.58	2.38	3.57	6.00	7.02
ATG5	0.56	0.73	0.60	0.31	0.33
AZI2	1.02	1.62	1.67	1.5	1.54
CARD9	0.56	0.79	1.12	6.48	0.87
CASP1	2.61	90.51	184.06	66.53	226.29
CASP10	0.72	1.60	3.59	1.38	2.43
CASP8	0.48	1.09	1.33	0.48	0.84
CCL3	1.04	0.85	32.09	4.52	40.00
CCL5	39.78	596.34	2262.97	1197.66	3774.32
CD40	0.91	1.12	2.02	0.42	2.28
CD80	1.64	1.28	2.42	22.25	7.32
CD86	0.78	0.85	0.82	4.10	2.13
CHUK	0.94	1.11	0.99	4.33	2.04
CTSB	1.28	0.81	1.35	0.38	0.54
CTSL	0.73	1.58	1.49	0.76	1.07
CTSS	1.58	3.76	8.08	1.07	4.93
CXCL10	1.54	48.17	682.18	94.09	1773.03
CXCL11	0.37	25.99	373.25	64.71	576.83
CXCL9	0.88	0.95	0.89	4.40	1.98
CYLD	0.79	1.66	2.61	1.07	2.27
TKFC	0.67	0.61	0.53	0.39	0.30
DDX3X	0.50	0.88	0.68	0.45	0.28
DDX58	0.98	16.91	14.46	4.61	13.38
DHX58	0.99	8.57	7.48	11.28	9.33
FADD	0.52	0.94	0.75	0.13	0.32
FOS	5.75	1.71	2.70	55.18	12.14
HSP90AA1	0.41	0.50	0.29	0.42	0.18
IFIH1	2.80	49.52	45.07	25.04	49.25
IFNA1	0.81	0.64	0.56	4.91	10.00
IFNA2	1.29	1.61	2.54	35.16	100.57
IFNAR1	0.83	0.66	0.89	0.20	0.51
IFNB1	0.78	87.43	64.18	1164.91	2821.02
IKBKB	0.42	0.86	0.75	0.25	0.33
IL12A	0.96	2.20	2.76	1.40	5.63
IL12B	0.52	0.71	0.83	4.22	1.10
IL15	1.14	1.17	1.52	0.24	1.22
IL18	0.85	0.62	0.45	0.36	0.43
IL1B	3.24	0.86	36.86	1.64	33.17
IL6	17.20	11.47	875.52	77.49	2355.80
CXCL8	13.12	4.50	92.03	4.19	154.56
IRAK1	0.60	0.62	0.43	0.37	0.25
IRF3	0.60	0.87	0.70	0.24	0.51
IRF5	0.82	0.69	0.62	0.23	0.35
IRF7	3.79	28.64	26.98	19.51	24.62
ISG15	13.78	252.48	212.90	133.07	357.55
JUN	2.24	2.89	3.02	6.80	10.43
MAP2K1	1.03	0.71	1.00	0.22	0.82
MAP2K3	1.00	1.09	1.61	0.26	1.41
MAP3K1	1.06	1.13	1.70	0.25	0.79
MAP3K7	0.57	0.76	0.60	0.44	0.36
MAPK1	0.75	0.60	0.53	0.31	0.32
MAPK14	0.80	0.75	0.76	0.10	0.34
MAPK3	0.91	0.52	0.58	0.63	0.50
MAPK8	0.77	0.85	1.39	0.22	0.93
MAVS	0.60	0.66	0.59	0.05	0.15
MEFV	1.07	2.77	88.28	4.10	106.30
MX1	18.69	530.06	375.85	102.25	269.10
MYD88	0.54	3.71	2.63	0.43	1.46
NFKB1	0.72	1.09	2.63	0.37	2.21
NFKBIA	1.99	1.58	4.45	2.01	5.63
NLRP3	0.78	0.85	0.82	4.10	2.30
NOD2	0.93	1.08	1.72	0.26	1.15
OAS2	25.35	2105.58	1503.39	1021.16	1575.94
PIN1	0.70	0.65	0.51	1.03	0.60
PSTPIP1	0.70	0.88	0.66	1.67	0.87
PYCARD	0.70	0.91	0.83	0.53	0.66
PYDC1	0.87	0.82	0.87	1.35	0.76
RELA	0.68	1.04	2.02	0.25	2.16
RIPK1	0.40	1.20	0.87	0.20	0.37
SPP1	0.85	1.08	1.03	0.52	0.85
STAT1	1.77	8.34	7.86	2.39	5.36
SUGT1	0.62	0.73	0.50	0.34	0.33
TBK1	0.65	1.06	1.08	0.13	0.34
TICAM1	1.10	1.55	1.71	1.24	1.93
TLR3	1.28	20.82	24.83	10.67	25.49
TLR7	1.10	1.83	1.14	4.10	2.13
TLR8	0.78	0.85	0.82	4.10	2.13
TLR9	0.87	0.88	1.02	6.66	1.18
TNF	5.59	7.06	156.93	11.76	458.89
TRADD	0.85	1.51	1.61	0.34	0.79
TRAF3	0.67	0.84	0.89	0.72	0.84
TRAF6	0.49	0.81	0.66	0.37	0.41
TRIM25	0.65	3.05	2.32	1.03	1.05
ACTB	0.60	0.65	0.40	0.27	0.26
B2M	1.91	7.46	9.67	4.65	7.79
GAPDH	1.29	0.63	0.80	1.07	1.07
HPRT1	0.90	0.66	0.71	0.72	0.77
RPLP0	0.75	0.49	0.45	1.04	0.59
