# Supplementary material for: Impact of Staphylococcus aureus Small Colony Variants on Human Lung Epithelial Cells with Subsequent Influenza Virus Infection
Source: MDPI journal article supplement (doi:10.3390/microorganisms8121998), 2020-12-15
Supplement: s1 [file Supplementary Table S2.xlsx]

## Sheet: Tabelle1
A
Infection scenario	Amount of upregulated genes	Gene names
3878SCV + PR8-M + superinfection	11	CXCL8, CASP1, ISG15, JUN, CCL5, IFIH1, OAS2, IL6, IRF7, TNF, Mx1
3878SCV + superinfection	2	FOS, IL1B
PR8-M + superinfection	14	DHX58, CXCL10, MYD88, DDX58, MEFV, IL12A, APOBEC3G, CXCL11, STAT1,CTSS, IFNB1, TRIM25, TLR3, B2M
superinfection	9	NFKBIA, NFKB1, CYLD, CCL3, IFNA2, CD40, CD80, RELA, CASP10
B
Infection scenario	Amount of upregulated genes	Gene names
3878SCV + Panama + superinfection	12	CXCL8, FOS, CASP1, ISG15, JUN, CCL5, IFIH1, OAS2, IL6, IRF7, TNF, Mx1
3878SCV + superinfection	1	IL1B
Panama + superinfection	21	TLR7, NFKKBIA, DHC58, CD86, CXCL10, DDX58, IFNA1, AIM2, MEFV, CHUK, CCL3, APOBEC3G, IFNA2, CD80, CXCL11, STAT1, NLRP3, TLR8, IFNB1, TLR3, B2M
Panama	4	TLR9, CXCL9, IL12B, CARD9
superinfection	7	NFKB1, CYLD, IL12A, CD40, RELA, CASP10, CTSS
